# Supplementary material for: Seaweed Supplements Normalise Metabolic, Cardiovascular and Liver Responses in High-Carbohydrate, High-Fat Fed Rats
Source: PubMed Central journal article supplement (PMC4344602; doi:10.3390/md13020788), 2015-02-02
Supplement: marinedrugs-13-00788-s001.pdf [file marinedrugs-13-00788-s001.pdf]

## Supplementary Information

**Table S1.** Micronutrient profile of diets.

| Mineral Ions     | Corn Starch (mg/kg) | High-Carbohydrate, High-Fat Diet (mg/kg) | <i>Ulva ohnoi</i> (mg/kg) | <i>Derbesia tenuissima</i> (mg/kg) |
|------------------|---------------------|------------------------------------------|---------------------------|------------------------------------|
| K                | 4760                | 4450                                     | 29,350                    | 13,400                             |
| Na               | 1475                | 1335                                     | 27,650                    | 61,100                             |
| Mg               | 914                 | 689                                      | 41,300                    | 13,000                             |
| Ca               | 7190                | 7790                                     | 2985                      | 4870                               |
| Fe               | 256.5               | 185                                      | 58.5                      | 360                                |
| P                | 2910                | 2500                                     | 742                       | 3620                               |
| Mn               | 23.5                | 18.2                                     | 13.0                      | 29.9                               |
| B                | 3.4                 | 2.9                                      | 85.9                      | 78.0                               |
| Al               | 17.6                | 20.9                                     | 16.3                      | 13.7                               |
| Sr               | 14.0                | 12.4                                     | 36.3                      | 77.2                               |
| Zn               | 22.1                | 18.3                                     | 12.0                      | 36.3                               |
| Cu               | 8.6                 | 7.1                                      | 11.7                      | 16.9                               |
| Ni               | 0.4                 | 0.3                                      | 2.8                       | 2.0                                |
| Mo               | 0.3                 | 0.1                                      | 0.3                       | 0.4                                |
| V                | 3.3                 | 5.3                                      | 1.0                       | 1.4                                |
| As               | 1.4                 | 1.2                                      | 0.0                       | 4.3                                |
| Cr               | 10.0                | 16.0                                     | 1.8                       | 3.2                                |
| Pb               | ≤0.05               | ≤0.05                                    | 0.3                       | 0.9                                |
| Se               | ≤1                  | ≤1                                       | 1.3                       | 3.1                                |
| Co               | ≤0.1                | ≤0.1                                     | 0.3                       | 0.5                                |
| Hg               | ≤0.5                | ≤0.5                                     | 1.3                       | 4.4                                |
| Cd               | ≤0.05               | ≤0.05                                    | 0.2                       | 0.3                                |
| <b>Sum total</b> | <b>18,291.0</b>     | <b>18,049.2</b>                          | <b>134,477.1</b>          | <b>114,723.4</b>                   |

Mineral ions profile (mean of samples,  $n = 2$ ).

**Table S2.** Essential mineral ion intake in rats fed control diets C or H and with either *Ulva ohnoi* or *Derbesia tenuissima*.

| Variable                 | C                         | CUO                        | CDT                        | H                         | HUO                       | HDT                       | p-Value |           |             |
|--------------------------|---------------------------|----------------------------|----------------------------|---------------------------|---------------------------|---------------------------|---------|-----------|-------------|
|                          |                           |                            |                            |                           |                           |                           | Diet    | Treatment | Interaction |
| Magnesium intake, mg/day | 32.6 ± 3.3 <sup>c</sup>   | 97.8 ± 7.8 <sup>a</sup>    | 50.4 ± 3.8 <sup>b</sup>    | 15.1 ± 1.3 <sup>d</sup>   | 59.5 ± 5.1 <sup>b</sup>   | 29.3 ± 1.8 <sup>c</sup>   | <0.0001 | <0.0001   | 0.05        |
| Potassium intake, mg/day | 169.9 ± 17.4 <sup>a</sup> | 204.5 ± 16.3 <sup>a</sup>  | 174.9 ± 13.0 <sup>a</sup>  | 97.2 ± 8.2 <sup>b</sup>   | 127.9 ± 10.9 <sup>b</sup> | 112.0 ± 6.7 <sup>b</sup>  | <0.0001 | 0.05      | 0.87        |
| Sodium intake, mg/day    | 52.7 ± 5.4 <sup>c</sup>   | 93.9 ± 7.5 <sup>b</sup>    | 146.0 ± 10.9 <sup>a</sup>  | 29.2 ± 2.5 <sup>d</sup>   | 58.7 ± 5.0 <sup>c</sup>   | 96.0 ± 5.8 <sup>b</sup>   | <0.0001 | <0.0001   | 0.17        |
| Calcium intake, mg/day   | 256.7 ± 26.3 <sup>a</sup> | 241.1 ± 19.3 <sup>ab</sup> | 239.5 ± 17.8 <sup>ab</sup> | 170.1 ± 14.4 <sup>b</sup> | 171.6 ± 14.6 <sup>b</sup> | 175.7 ± 10.5 <sup>b</sup> | <0.0001 | 0.92      | 0.81        |
| Zinc intake, mg/day      | 0.79 ± 0.08 <sup>a</sup>  | 0.75 ± 0.06 <sup>a</sup>   | 0.77 ± 0.06 <sup>a</sup>   | 0.40 ± 0.03 <sup>b</sup>  | 0.41 ± 0.03 <sup>b</sup>  | 0.44 ± 0.03 <sup>b</sup>  | <0.0001 | 0.90      | 0.84        |

Values are mean ± SEM,  $n = 8-10$ . Mean within a row with the same superscript are not statistically different,  $p < 0.05$ . C, corn starch fed rats; CUO, cornstarch rats treated with *Ulva ohnoi*; CDT, cornstarch rats treated with *Derbesia tenuissima*; H, high-carbohydrate, high-fat diet fed rats; HUO, high-carbohydrate, high-fat rats treated with *Ulva ohnoi*; HDT, high-carbohydrate, high-fat rats treated with *Derbesia tenuissima*.

**Table S3.** Total fat, SF, MUFA and PUFA intake in rats fed control diets C or H and with either *Ulva ohnoi* or *Derbesia tenuissima*.

| Variable                                   | C                        | CUO                      | CDT                      | H                        | HUO                      | HDT                      | p-Value |           |             |
|--------------------------------------------|--------------------------|--------------------------|--------------------------|--------------------------|--------------------------|--------------------------|---------|-----------|-------------|
|                                            |                          |                          |                          |                          |                          |                          | Diet    | Treatment | Interaction |
| Total fat intake, g/day ( $n = 8-10$ )     | 0.29 ± 0.02 <sup>b</sup> | 0.28 ± 0.02 <sup>b</sup> | 0.34 ± 0.03 <sup>b</sup> | 5.23 ± 0.44 <sup>a</sup> | 5.19 ± 0.44 <sup>a</sup> | 5.29 ± 0.32 <sup>a</sup> | <0.0001 | 0.96      | 0.99        |
| Saturated fatty acid, g/day ( $n = 8-10$ ) | 0.08 ± 0.01 <sup>b</sup> | 0.09 ± 0.01 <sup>b</sup> | 0.10 ± 0.00 <sup>b</sup> | 2.77 ± 0.23 <sup>a</sup> | 2.75 ± 0.23 <sup>a</sup> | 2.80 ± 0.17 <sup>a</sup> | <0.0001 | 0.98      | 0.99        |
| MUFA, g/day ( $n = 8-10$ )                 | 0.10 ± 0.01 <sup>b</sup> | 0.09 ± 0.01 <sup>b</sup> | 0.10 ± 0.01 <sup>b</sup> | 2.28 ± 0.19 <sup>a</sup> | 2.29 ± 0.19 <sup>a</sup> | 2.31 ± 0.14 <sup>a</sup> | <0.0001 | 0.99      | 0.99        |
| PUFA, g/day ( $n = 8-10$ )                 | 0.10 ± 0.01 <sup>b</sup> | 0.09 ± 0.01 <sup>b</sup> | 0.10 ± 0.01 <sup>b</sup> | 0.15 ± 0.01 <sup>a</sup> | 0.15 ± 0.01 <sup>a</sup> | 0.17 ± 0.01 <sup>a</sup> | <0.0001 | 0.32      | 0.61        |
| ALA, mg/day ( $n = 8-10$ )                 | 13.2 ± 1.4 <sup>c</sup>  | 21.4 ± 1.7 <sup>b</sup>  | 28.9 ± 2.2 <sup>a</sup>  | 5.0 ± 0.0 <sup>d</sup>   | 5.6 ± 0.5 <sup>d</sup>   | 16.6 ± 0.9 <sup>c</sup>  | <0.0001 | <0.0001   | 0.03        |
| EPA, mg/day ( $n = 8-10$ )                 | 0.0 ± 0.0 <sup>c</sup>   | 0.0 ± 0.0 <sup>c</sup>   | 1.9 ± 0.1 <sup>a</sup>   | 0.0 ± 0.0 <sup>c</sup>   | 0.0 ± 0.0 <sup>c</sup>   | 1.3 ± 0.1 <sup>b</sup>   | 0.0002  | <0.0001   | <0.0001     |

Values are mean ± SEM,  $n = 8-10$ . Means within a row with the same superscript are not statistically different,  $p < 0.05$ . C, corn starch fed rats; CUO, cornstarch rats treated with *Ulva ohnoi*; CDT, cornstarch rats treated with *Derbesia tenuissima*; H, high-carbohydrate, high-fat diet fed rats; HUO, high-carbohydrate, high-fat rats treated with *Ulva ohnoi*; HDT, high-carbohydrate, high-fat rats treated with *Derbesia tenuissima*;

<sup>2</sup> MUFA, mono-unsaturated fatty acid; PUFA, polyunsaturated fatty acid; ALA, alpha-linolenic acid; EPA, eicosapentaenoic acid.

**Table S4.** Cardiovascular structure and function in rats fed control diets C or H and with either *Ulva ohnoi* or *Derbesia tenuissima*.

| Variable                 | C                          | CUO                       | CDT                         | H                          | HUO                       | HDT                       | p-Value |           |             |
|--------------------------|----------------------------|---------------------------|-----------------------------|----------------------------|---------------------------|---------------------------|---------|-----------|-------------|
|                          |                            |                           |                             |                            |                           |                           | Diet    | Treatment | Interaction |
| LVIDd, mm                | 7.3 ± 0.2                  | 7.7 ± 0.2                 | 7.8 ± 0.2                   | 7.7 ± 0.2                  | 7.9 ± 0.1                 | 7.7 ± 0.4                 | 0.38    | 0.39      | 0.56        |
| LVIDs, mm                | 3.1 ± 0.3 <sup>b</sup>     | 4.3 ± 0.3 <sup>a</sup>    | 4.4 ± 0.3 <sup>a</sup>      | 3.5 ± 0.3 <sup>b</sup>     | 4.4 ± 0.1 <sup>a</sup>    | 3.3 ± 0.1 <sup>b</sup>    | 0.36    | 0.001     | 0.016       |
| Heart rate               | 332.7 ± 33.1 <sup>a</sup>  | 252.3 ± 12.5 <sup>b</sup> | 245.0 ± 6.8 <sup>b</sup>    | 373.0 ± 15.5 <sup>a</sup>  | 217.6 ± 5.1 <sup>b</sup>  | 393.6 ± 33.5 <sup>a</sup> | 0.007   | <0.0001   | 0.001       |
| IVSd, mm                 | 1.8 ± 0.0                  | 1.9 ± 0.0                 | 2.0 ± 0.1                   | 1.9 ± 0.0                  | 1.9 ± 0.0                 | 1.9 ± 0.1                 | 1.00    | 0.18      | 0.18        |
| IVSs, mm                 | 3.30 ± 0.09                | 3.00 ± 0.13               | 3.35 ± 0.10                 | 3.39 ± 0.10                | 3.20 ± 0.09               | 3.44 ± 0.12               | 0.15    | 0.017     | 0.84        |
| LVPWs, mm                | 3.00 ± 0.07                | 2.93 ± 0.09               | 3.15 ± 0.12                 | 3.26 ± 0.13                | 2.95 ± 0.09               | 3.28 ± 0.11               | 0.12    | 0.036     | 0.52        |
| LVPWd, mm                | 1.83 ± 0.06 <sup>b</sup>   | 1.76 ± 0.04 <sup>b</sup>  | 1.99 ± 0.04 <sup>a</sup>    | 1.85 ± 0.03 <sup>ab</sup>  | 1.85 ± 0.04 <sup>ab</sup> | 1.83 ± 0.07 <sup>ab</sup> | 0.68    | 0.104     | 0.040       |
| Diastolic volume, µL     | 377.8 ± 35.7               | 463.0 ± 35.9              | 497.0 ± 31.5                | 482.0 ± 35.4               | 516.0 ± 21.6              | 485.0 ± 36.3              | 0.09    | 0.13      | 0.24        |
| Systolic volume, µL      | 48.0 ± 6.3 <sup>b</sup>    | 88.0 ± 15.0 <sup>a</sup>  | 95.0 ± 15.4 <sup>a</sup>    | 53.0 ± 11.8 <sup>b</sup>   | 90.0 ± 7.4 <sup>a</sup>   | 40.0 ± 5.0 <sup>b</sup>   | 0.08    | 0.004     | 0.012       |
| SBP:LVIDs                | 35.2 ± 1.8 <sup>b</sup>    | 29.4 ± 2.0 <sup>c</sup>   | 30.4 ± 1.9 <sup>c</sup>     | 47.3 ± 3.9 <sup>a</sup>    | 29.2 ± 0.9 <sup>b</sup>   | 40.1 ± 1.6 <sup>b</sup>   | 0.0006  | <0.0001   | 0.033       |
| SBP:systolic volume      | 3096 ± 525 <sup>ab</sup>   | 1731 ± 363 <sup>b</sup>   | 1716 ± 340 <sup>b</sup>     | 4818 ± 1129 <sup>a</sup>   | 1497 ± 137 <sup>b</sup>   | 3690 ± 458 <sup>ab</sup>  | 0.035   | 0.003     | 0.18        |
| ESS:LVIDs                | 2.02 ± 0.07 <sup>b</sup>   | 2.10 ± 0.06 <sup>b</sup>  | 2.09 ± 0.08 <sup>b</sup>    | 2.44 ± 0.09 <sup>a</sup>   | 2.17 ± 0.07 <sup>b</sup>  | 2.02 ± 0.08 <sup>b</sup>  | 0.032   | 0.09      | 0.008       |
| Stroke volume, µL        | 330.0 ± 33.9               | 375.0 ± 32.5              | 456.0 ± 44.7                | 429.0 ± 29.5               | 452.0 ± 25.3              | 445.0 ± 33.8              | 0.05    | 0.12      | 0.24        |
| Cardiac output, mL/min   | 112.9 ± 20.1 <sup>bc</sup> | 93.6 ± 7.4 <sup>c</sup>   | 128.7 ± 20.6 <sup>abc</sup> | 159.5 ± 11.9 <sup>ab</sup> | 98.1 ± 5.1 <sup>c</sup>   | 172.2 ± 16.7 <sup>a</sup> | 0.016   | 0.003     | 0.32        |
| Relative wall thickness  | 0.52 ± 0.02                | 0.49 ± 0.02               | 0.49 ± 0.03                 | 0.47 ± 0.03                | 0.47 ± 0.01               | 0.49 ± 0.02               | 0.23    | 0.81      | 0.57        |
| Systolic wall stress     | 71.4 ± 4.5                 | 90.7 ± 6.8                | 92.1 ± 6.4                  | 87.5 ± 9.4                 | 95.9 ± 4.9                | 68.1 ± 5.4                | 0.48    | 0.12      | 0.035       |
| Fractional shortening, % | 50.1 ± 2.4 <sup>ab</sup>   | 49.8 ± 1.3 <sup>ab</sup>  | 47.1 ± 2.0 <sup>ab</sup>    | 51.3 ± 3.5 <sup>ab</sup>   | 45.0 ± 1.1 <sup>b</sup>   | 56.7 ± 1.4 <sup>a</sup>   | 0.30    | 0.14      | 0.012       |
| Ejection fraction, %     | 86.9 ± 1.6 <sup>ab</sup>   | 81.2 ± 1.3 <sup>b</sup>   | 84.5 ± 1.8 <sup>b</sup>     | 87.8 ± 2.6 <sup>ab</sup>   | 83.5 ± 0.9 <sup>b</sup>   | 91.8 ± 0.8 <sup>a</sup>   | 0.018   | 0.003     | 0.17        |
| Estimated LV mass, g     | 0.90 ± 0.10 <sup>b</sup>   | 1.04 ± 0.04 <sup>b</sup>  | 1.36 ± 0.12 <sup>a</sup>    | 1.03 ± 0.08 <sup>b</sup>   | 1.17 ± 0.03 <sup>ab</sup> | 1.09 ± 0.06 <sup>ab</sup> | 0.96    | 0.010     | 0.025       |

Values are mean ± SEM,  $n = 8-10$ . Means within a row with the same superscript are not statistically different,  $p < 0.05$ . C, corn starch fed rats; CUO, cornstarch rats treated with *Ulva ohnoi*; CDT, cornstarch rats treated with *Derbesia tenuissima*; H, high-carbohydrate, high-fat diet fed rats; HUO, high-carbohydrate, high-fat rats treated with *Ulva ohnoi*; HDT, high-carbohydrate, high-fat rats treated with *Derbesia tenuissima*; <sup>2</sup>LVIDd, left ventricular internal diameter during diastole; LVIDs, left ventricular internal diameter during systole; IVSd, interventricular septum during diastole; IVSs, interventricular septum thickness during systole; LVPWd, left ventricular posterior wall thickness during diastole; LVPWs, left ventricular posterior wall thickness during systole; SBP, systolic blood pressure; ESS, end systolic wall stress.
